# Supplementary material
Source: PubMed Central journal article supplement (PMC4381343)
Supplement: NIHMS671349-supplement-supplement_1.pdf [file NIHMS671349-supplement-supplement_1.pdf]

# Directional Emission from Metal-Dielectric-Metal Structures: Effect of Mixed Metal Layers, Dye Location and Dielectric Thickness

Sharmistha Dutta Choudhury<sup>a\*</sup>, Ramachandram Badugu<sup>b</sup>, Krishanu Ray<sup>b</sup>, Joseph R. Lakowicz<sup>b\*</sup>

<sup>a</sup>Radiation & Photochemistry Division, Bhabha Atomic Research Center, Mumbai 400085, India

<sup>b</sup>Center for Fluorescence Spectroscopy, Department of Biochemistry and Molecular Biology, University of Maryland Baltimore, 725 West Lombard Street, Baltimore, Maryland 21201, United States

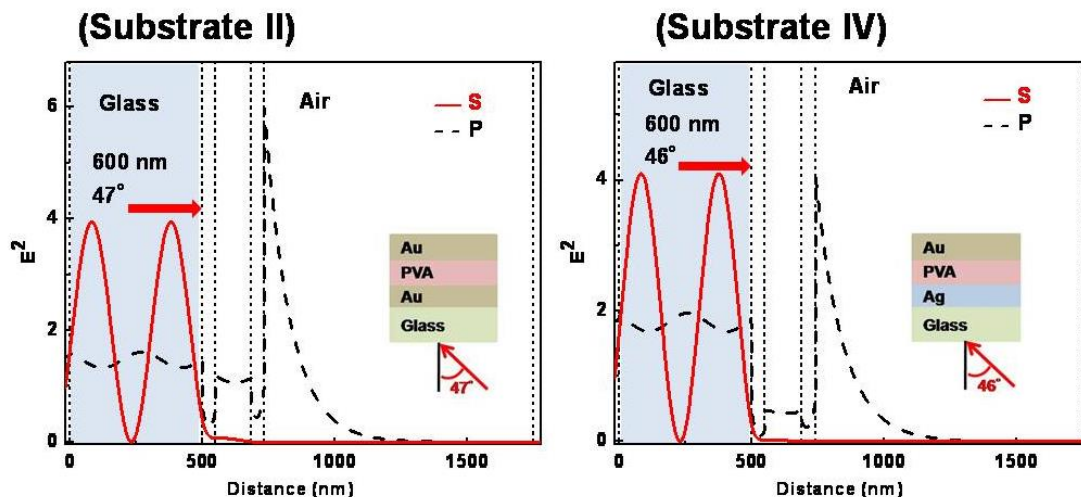

**Figure S1.** Calculated electric field intensities in MDM substrate II and IV for 600 nm illumination at the respective resonance angles; S-polarized (red) and P-polarized (black).

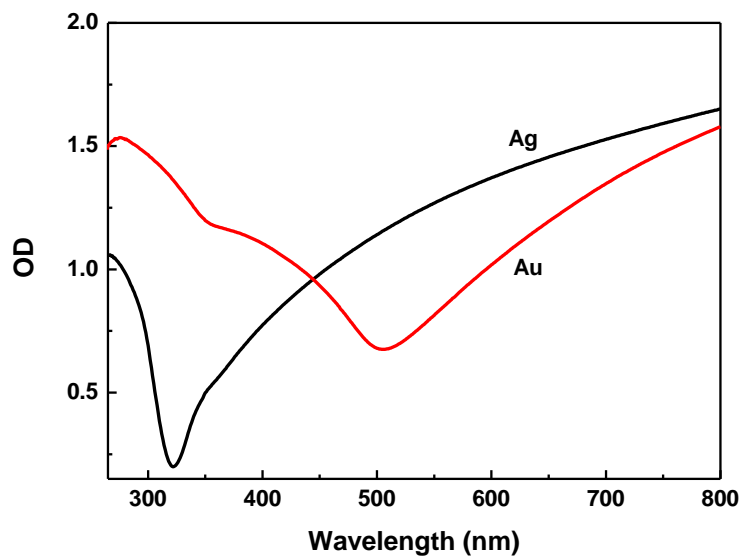

**Figure S2.** Extinction spectra of 50 nm Ag and Au films deposited on glass slide.

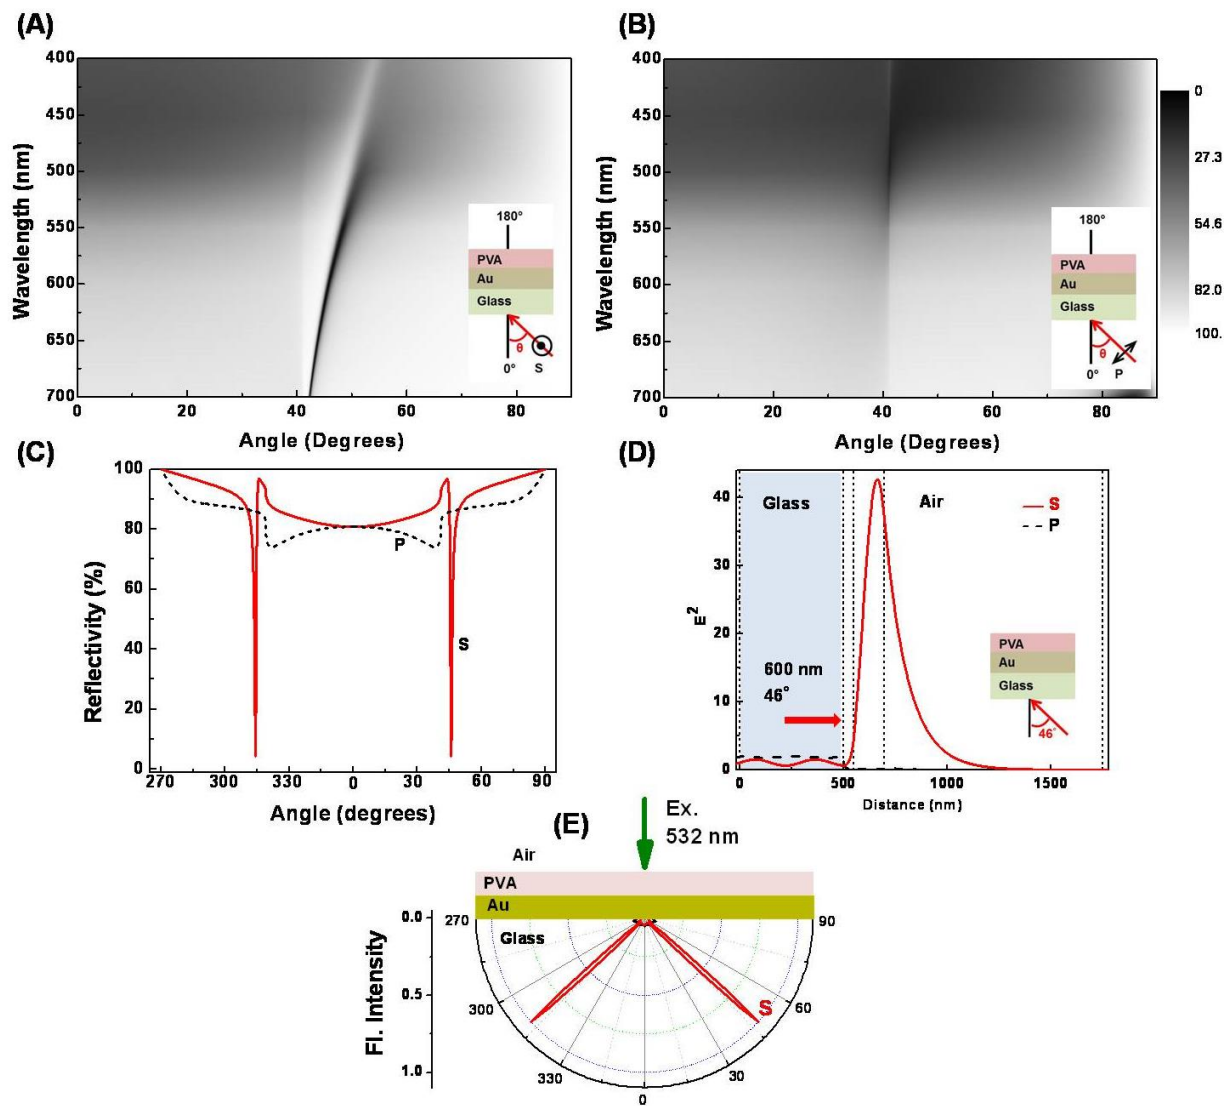

**Figure S3.** Calculated reflectivity dispersion diagrams,  $R(\lambda, \theta)$ , for S-polarized (A) and P-polarized illumination in the PVA-Au-glass MD substrate (B), angle-dependent reflectivity with 600 nm incident light (C), electric field intensity for 600 nm illumination (S- and P-polarized) at the reflectivity minimum of 46° (D) and experimentally observed angle-dependent emission intensities at 600 nm from S101 embedded in the PVA layer, PVA thickness 150 nm (E).

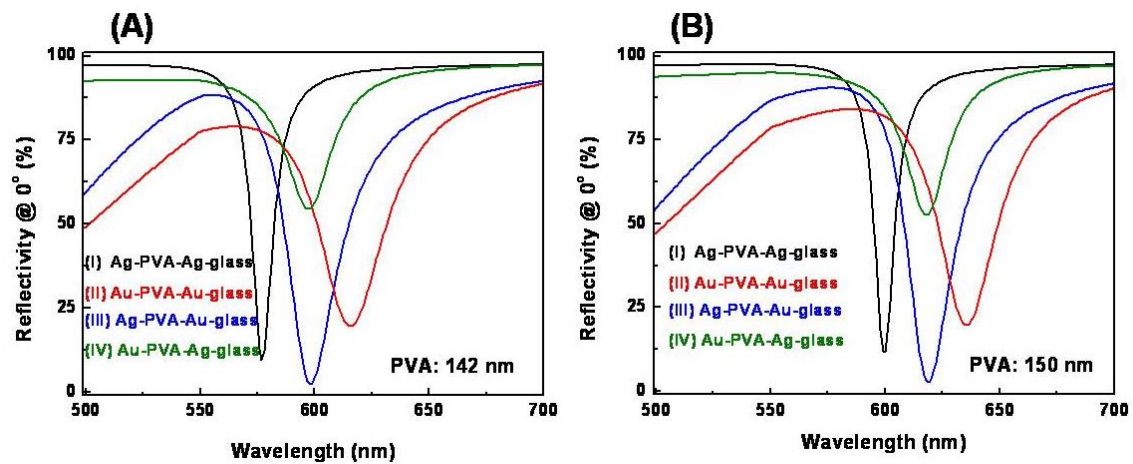

**Figure S4.** Wavelengths at which the reflectivity dip at  $0^\circ$  is obtained in different MDM substrates for PVA thickness of 142 nm (A) and 150 nm (B).
